# Supplementary material
Source: MDPI journal article supplement (doi:10.3390/horticulturae12030318)
Supplement: s1 [file horticulturae-4149681-supplementary.pdf › horticulturae-4149681-supplementary.pdf]

Supplemental file for: Cauliflower Yield, Growth, and Physiological Responses to Environments, Fall Planting Dates, and Cultivars in North Dakota.

**Table S1.** Days to harvest and yield performance of cauliflower cultivars across two growing seasons as affected by field environment and planting date.

| Envir-<br>onment | Cultivar         | Date       | Days to Harvest (Day) |             |             | Yield (g)    |              |              |
|------------------|------------------|------------|-----------------------|-------------|-------------|--------------|--------------|--------------|
|                  |                  |            | 2023                  | 2024        | Year Mean   | 2023         | 2024         | Year Mean    |
| High<br>Tunnel   | Amazing          | 10 Jul     | 99.00±15.59           | 83.33±2.89  | 91.17±13.20 | 1415.0±238.5 | 993.7±86.9   | 1204.3±281.1 |
|                  |                  | 25 Jul     | -                     | 78.00±9.63  | 78.00±9.63  | -            | 990.8±433.5  | 990.8±433.5  |
|                  |                  | 10 Aug     | 101.00±0.00           | 85.67±5.77  | 89.50±9.00  | 191.0±0.0    | 420.7±192.4  | 363.3±194.6  |
|                  | Cheddar          | 10 Jul     | 88.75±12.01           | 71.00±0.00  | 81.14±12.73 | 1403.5±433.5 | 819.7±325.4  | 1153.3±476.1 |
|                  |                  | 25 Jul     | -                     | 60.33±4.51  | 60.33±4.51  | -            | 624.0±248.0  | 624.0±248.0  |
|                  |                  | 10 Aug     | 86.00±0.00            | 72.00±3.46  | 75.50±7.55  | 122.0±0.0    | 994.7±382.1  | 776.5±536.4  |
|                  | Clementine       | 10 Jul     | 91.00±12.73           | 77.75±11.00 | 82.17±12.32 | 1323.0±920.7 | 886.8±609.1  | 1032.2±665.5 |
|                  |                  | 25 Jul     | 109.50±10.61          | 70.50±12.92 | 83.50±22.98 | 439.0±250.3  | 885.3±146.0  | 736.5±280.0  |
|                  |                  | 10 Aug     | 96.75±7.18            | 71.25±7.32  | 84.00±15.19 | 176.3±72.6   | 586.8±245.0  | 381.5±275.9  |
|                  | Flame Star       | 10 Jul     | 103.67±23.86          | 71.00±24.76 | 87.33±28.16 | 1547.7±612.3 | 1066.0±421.4 | 1355.0±549.1 |
|                  |                  | 25 Jul     | 117.00±0.00           | 73.75±14.36 | 88.17±24.95 | 61.5±33.2    | 732.5±358.1  | 508.8±444.1  |
|                  |                  | 10 Aug     | -                     | 89.00±0.00  | 89.00±0.00  | -            | 941.5±873.3  | 941.5±873.3  |
|                  | Snow<br>Crown    | 10 Jul     | 76.00±0.00            | 62.00±4.76  | 69.00±8.11  | 1599.0±273.3 | 591.5±303.4  | 1095.3±601.2 |
|                  |                  | 25 Jul     | 85.75±5.68            | 59.25±4.27  | 72.50±14.91 | 1792.5±287.8 | 662.3±181.8  | 1227.4±643.9 |
|                  |                  | 10 Aug     | 100.33±0.58           | 68.75±7.09  | 82.29±17.61 | 319.7±174.0  | 904.5±515.6  | 653.9±490.6  |
|                  | Vitaverde        | 10 Jul     | 107.33±8.74           | 88.33±18.93 | 97.83±16.80 | 733.7±361.4  | 408.3±149.1  | 571.0±304.8  |
|                  |                  | 25 Jul     | 117.00±0.00           | 56.00±0.00  | 76.33±31.50 | 182.5±65.8   | 444.0±109.9  | 356.8±162.3  |
|                  |                  | 10 Aug     | 100.67±0.58           | 73.75±12.53 | 85.29±16.90 | 225.3±63.8   | 722.5±226.2  | 509.4±312.4  |
|                  | Cultivar<br>Mean | Amazing    | 99.50±12.77           | 81.90±7.23  | 86.93±11.91 | 1109.0±642.2 | 820.6±385.6  | 903.0±465.2  |
|                  |                  | Cheddar    | 88.20±10.47           | 67.78±6.28  | 75.07±12.69 | 1147.2±685.1 | 812.8±322.7  | 932.2±486.0  |
|                  |                  | Clementine | 98.50±10.66           | 73.17±10.23 | 83.30±16.27 | 528.6±621.2  | 786.3±380.9  | 683.2±492.9  |
|                  |                  | Flame Star | 109.00±18.38          | 76.22±16.87 | 87.93±23.34 | 953.2±922.1  | 868.1±461.0  | 900.8±639.7  |
|                  |                  | Snow Crown | 86.18±10.55           | 63.33±6.50  | 74.26±14.42 | 1320.5±688.4 | 719.4±355.3  | 1006.9±610.6 |
|                  |                  | Vitaverde  | 107.25±8.22           | 71.27±17.37 | 86.42±22.96 | 405.3±336.7  | 535.5±213.6  | 480.7±271.7  |
|                  | Date Mean        | 10 Jul     | 93.21±16.11           | 75.00±14.39 | 83.87±17.65 | 1355.0±488.2 | 774.2±390.5  | 1064.6±526.1 |
|                  |                  | 25 Jul     | 103.00±15.87          | 66.57±11.80 | 77.61±21.35 | 853.6±839.5  | 727.4±302.9  | 765.7±514.5  |
|                  |                  | 10 Aug     | 98.08±5.66            | 75.30±9.87  | 83.84±14.02 | 221.1±109.7  | 749.2±400.2  | 551.2±412.2  |
| Open             | Amazing          | 10 Jul     | 90.25±10.11           | 69.50±3.00  | 79.88±13.07 | 1384.0±225.8 | 1212.0±349.9 | 1298.0±287.7 |
|                  |                  | 25 Jul     | -                     | 61.67±2.89  | 61.67±2.89  | -            | 881.0±75.3   | 881.0±75.3   |
|                  |                  | 10 Aug     | -                     | 71.67±7.51  | 71.67±7.51  | -            | 485.7±318.0  | 485.7±318.0  |
|                  | Cheddar          | 10 Jul     | 80.00±2.83            | 66.00±3.46  | 70.67±7.81  | 1621.0±165.5 | 974.8±268.0  | 1190.2±399.9 |
|                  |                  | 25 Jul     | -                     | 56.00±0.00  | 56.00±0.00  | -            | 1396.3±280.6 | 1396.3±280.6 |
|                  |                  | 10 Aug     | -                     | 67.00±6.06  | 67.00±6.06  | -            | 567.5±329.7  | 567.5±329.7  |
|                  | Clementine       | 10 Jul     | 80.00±2.31            | 63.00±8.00  | 72.71±10.32 | 1149.0±446.6 | 837.7±280.2  | 1015.6±391.9 |
|                  |                  | 25 Jul     | 81.00±12.73           | 56.00±0.00  | 64.33±14.11 | 715.0±63.6   | 697.0±252.2  | 703.0±197.7  |
|                  |                  | 10 Aug     | -                     | 73.00±4.24  | 73.00±4.24  | -            | 390.5±328.8  | 390.5±328.8  |
|                  | Flame Star       | 10 Jul     | 87.25±4.50            | 71.75±6.18  | 79.50±9.68  | 1749.3±756.4 | 1524.3±466.7 | 1636.8±594.2 |
|                  |                  | 25 Jul     | -                     | 58.00±2.31  | 58.00±2.31  | -            | 820.3±157.5  | 820.3±157.5  |
|                  |                  | 10 Aug     | -                     | 82.50±7.51  | 82.50±7.51  | -            | 316.5±109.8  | 316.5±109.8  |
|                  |                  | 10 Jul     | 69.75±5.50            | 58.25±9.29  | 64.00±9.37  | 945.5±737.1  | 931.5±515.5  | 938.5±588.9  |

|            |                  |             |             |             |             |              |              |              |
|------------|------------------|-------------|-------------|-------------|-------------|--------------|--------------|--------------|
|            | Snow             | 25 Jul      | 72.00±0.00  | 53.00±3.46  | 56.80±9.01  | 1252.0±0.0   | 841.8±214.5  | 923.8±261.1  |
|            | Crown            | 10 Aug      | 74.00±0.00  | 60.75±10.44 | 65.17±10.59 | 976.0±101.8  | 777.7±404.6  | 857.0±310.2  |
|            |                  | 10 Jul      | 98.00±6.24  | 64.00±6.56  | 81.00±19.48 | 1165.3±429.0 | 591.7±80.9   | 878.5±418.3  |
|            | Vitaverde        | 25 Jul      | -           | 57.33±2.31  | 57.33±2.31  | -            | 819.3±581.3  | 819.3±581.3  |
|            |                  | 10 Aug      | 86.00±0.00  | 77.25±9.88  | 79.00±9.41  | 529.0±0.0    | 348.3±183.1  | 384.4±178.0  |
|            |                  | Amazing     | 90.25±10.11 | 67.80±6.01  | 74.21±12.63 | 1384.0±225.8 | 894.8±406.4  | 1034.6±422.7 |
|            |                  | Cheddar     | 80.00±2.83  | 63.64±6.23  | 66.15±8.41  | 1621.0±165.5 | 941.6±434.0  | 1046.2±473.6 |
|            | Cultivar         | Clementine  | 80.33±5.99  | 62.11±8.18  | 69.40±11.68 | 1004.3±413.1 | 675.8±295.6  | 807.2±372.4  |
|            | Mean             | Flame Star  | 87.25±4.50  | 70.75±11.70 | 74.88±12.61 | 1749.3±756.4 | 887.0±580.6  | 1102.6±714.4 |
|            |                  | Snow Crown  | 71.29±4.39  | 57.33±8.24  | 62.47±9.78  | 998.0±534.9  | 856.9±361.2  | 911.8±427.5  |
|            |                  | Vitaverde   | 95.00±7.87  | 67.30±11.14 | 75.21±16.40 | 1006.3±473.2 | 562.6±361.1  | 689.4±430.4  |
|            |                  | 10 Jul      | 83.95±10.62 | 65.59±7.26  | 74.56±12.90 | 1316.6±555.8 | 1039.0±439.1 | 1174.6±513.0 |
|            | Date Mean        | 25 Jul      | 78.00±10.39 | 56.81±3.31  | 59.46±8.38  | 894.0±313.3  | 891.7±332.4  | 892.0±323.4  |
|            |                  | 10 Aug      | 78.00±6.93  | 71.95±10.46 | 72.71±10.17 | 827.0±267.9  | 475.0±289.2  | 520.9±305.7  |
|            |                  | 10 Jul      | 94.00±12.41 | 75.43±7.87  | 84.71±13.88 | 1397.3±211.5 | 1118.4±278.2 | 1257.9±278.0 |
| Amazing    |                  | 25 Jul      | -           | 71.00±11.20 | 71.00±11.20 | -            | 943.7±315.1  | 943.7±315.1  |
|            |                  | 10 Aug      | 101.00±0.00 | 78.67±9.73  | 81.86±12.25 | 191.0±0.0    | 453.2±237.7  | 415.7±238.6  |
|            |                  | 10 Jul      | 85.83±10.42 | 68.14±3.63  | 76.31±11.66 | 1476.0±361.7 | 908.3±279.4  | 1170.3±424.6 |
| Cheddar    |                  | 25 Jul      | -           | 58.17±3.71  | 58.17±3.71  | -            | 1010.2±484.8 | 1010.2±484.8 |
|            |                  | 10 Aug      | 86.00±0.00  | 69.14±5.43  | 71.25±7.80  | 122.0±0.0    | 750.6±393.9  | 672.0±427.1  |
|            |                  | 10 Jul      | 83.67±8.24  | 71.43±12.00 | 77.08±11.86 | 1207.0±545.2 | 865.7±460.8  | 1023.2±511.3 |
| Clementine |                  | 25 Jul      | 95.25±19.03 | 63.25±11.47 | 73.92±20.76 | 577.0±218.2  | 791.1±215.7  | 719.8±231.8  |
|            |                  | 10 Aug      | 96.75±7.18  | 71.83±6.05  | 81.80±14.25 | 176.3±72.6   | 521.3±260.6  | 383.3±266.9  |
|            |                  | 10 Jul      | 94.29±16.64 | 71.43±14.95 | 82.86±19.28 | 1662.9±650.1 | 1371.5±471.4 | 1528.4±571.6 |
| Flame Star |                  | 25 Jul      | 117.00±0.00 | 65.88±12.71 | 76.10±24.30 | 61.5±33.2    | 776.4±260.4  | 633.4±379.1  |
|            |                  | 10 Aug      | -           | 84.67±6.71  | 84.67±6.71  | -            | 524.8±513.7  | 524.8±513.7  |
|            |                  | 10 Jul      | 72.88±4.91  | 60.13±7.12  | 66.50±8.85  | 1272.3±622.0 | 761.5±431.7  | 1016.9±580.6 |
| Snow Crown |                  | 25 Jul      | 83.00±7.87  | 56.13±4.91  | 66.46±14.83 | 1684.4±347.2 | 752.0±207.6  | 1110.6±536.9 |
|            |                  | 10 Aug      | 89.80±14.43 | 64.75±9.30  | 74.38±16.76 | 582.2±383.4  | 850.1±438.2  | 738.5±421.0  |
|            |                  | 10 Jul      | 102.67±8.50 | 76.17±18.39 | 89.42±19.44 | 949.5±426.3  | 500.0±147.0  | 724.8±384.1  |
| Vitaverde  |                  | 25 Jul      | 117.00±0.00 | 56.57±1.51  | 70.00±26.68 | 182.5±65.8   | 604.9±398.6  | 511.0±393.0  |
|            |                  | 10 Aug      | 97.00±7.35  | 75.50±10.61 | 82.67±14.09 | 301.3±160.5  | 535.4±276.3  | 457.3±262.5  |
|            | Environment Mean | High Tunnel | 97.02±14.09 | 72.02±12.65 | 81.88±18.01 | 900.8±711.5  | 748.8±358.3  | 809.3±530.0  |
|            |                  | Open Field  | 82.63±10.25 | 64.80±9.71  | 70.09±12.79 | 1215.3±536.9 | 810.9±428.6  | 932.2±496.9  |
|            |                  | Amazing     | 94.88±11.75 | 74.85±9.71  | 80.57±13.67 | 1246.5±469.3 | 857.7±387.4  | 968.8±441.3  |
|            |                  | Cheddar     | 85.86±9.51  | 65.50±6.44  | 70.78±11.57 | 1282.6±609.0 | 883.7±383.8  | 987.1±474.3  |
|            | Cultivar Mean    | Clementine  | 90.71±12.73 | 68.43±10.76 | 77.34±15.90 | 732.5±577.1  | 738.9±343.3  | 736.3±443.5  |
|            |                  | Flame Star  | 99.33±17.55 | 73.10±14.03 | 80.97±19.24 | 1307.0±903.2 | 879.5±523.0  | 1012.1±677.7 |
|            |                  | Snow Crown  | 80.39±11.32 | 60.33±7.88  | 68.93±13.74 | 1195.1±637.2 | 785.2±356.8  | 965.1±533.8  |
|            |                  | Vitaverde   | 103.17±9.81 | 69.38±14.52 | 81.67±20.91 | 605.6±469.9  | 548.4±285.8  | 569.2±357.4  |
|            |                  | 10 Jul      | 88.35±14.13 | 70.07±12.07 | 78.99±15.95 | 1334.9±518.4 | 916.3±433.3  | 1123.0±518.9 |
| Date Mean  |                  | 25 Jul      | 97.23±18.09 | 61.91±10.03 | 69.96±19.26 | 862.9±738.4  | 805.8±324.4  | 818.9±445.2  |
|            |                  | 10 Aug      | 94.07±10.06 | 73.59±10.19 | 79.07±13.60 | 342.3±287.5  | 612.1±371.6  | 538.5±368.6  |

Dashes (–) indicate treatment combinations where plants did not survive to harvest due to freeze exposure; these observations were excluded from statistical analysis.

**Table S2.** Days to curd diameter and fresh root weight of cauliflower cultivars across two growing seasons as affected by field environment and planting date.

| Environ-<br>ment | Cultivar         | Date       | Curd Diameter (cm) |            |            | Fresh Root Weight (g) |            |            |
|------------------|------------------|------------|--------------------|------------|------------|-----------------------|------------|------------|
|                  |                  |            | 2023               | 2024       | Year Mean  | 2023                  | 2024       | Year Mean  |
| High<br>Tunnel   | Amazing          | 10 Jul     | 20.24±1.30         | 17.86±1.25 | 19.05±1.73 | 143.3±42.4            | 165.3±45.1 | 154.3±41.0 |
|                  |                  | 25 Jul     | -                  | 17.57±2.11 | 17.57±2.11 | 110.0±0.0             | 138.3±34.0 | 131.3±31.1 |
|                  |                  | 10 Aug     | 12.70±0.00         | 13.05±1.94 | 12.96±1.60 | 108.0±41.8            | 60.0±0.0   | 96.0±41.7  |
|                  | Cheddar          | 10 Jul     | 18.23±1.43         | 15.65±1.76 | 17.12±1.99 | 158.0±69.0            | 189.0±84.0 | 171.3±70.8 |
|                  |                  | 25 Jul     | -                  | 14.54±1.80 | 14.54±1.80 | 166.0±0.0             | 130.5±58.7 | 142.3±46.3 |
|                  |                  | 10 Aug     | 8.89±0.00          | 15.75±2.01 | 14.03±3.80 | 83.7±41.0             | 151.0±26.9 | 110.6±48.8 |
|                  | Clementine       | 10 Jul     | 18.93±3.77         | 16.37±3.09 | 17.22±3.21 | 113.0±32.5            | 151.0±41.4 | 138.3±40.3 |
|                  |                  | 25 Jul     | 13.97±3.59         | 17.03±1.77 | 16.01±2.64 | 101.5±58.4            | 166.8±61.2 | 134.1±65.5 |
|                  |                  | 10 Aug     | 9.34±1.58          | 14.58±2.29 | 11.96±3.34 | 130.3±39.8            | 88.3±21.4  | 109.3±37.1 |
|                  | Flame Star       | 10 Jul     | 18.88±2.78         | 17.78±1.07 | 18.44±2.13 | 247.0±91.9            | 187.0±32.5 | 217.0±66.1 |
|                  |                  | 25 Jul     | 6.35±1.80          | 15.58±3.88 | 12.50±5.69 | 94.7±45.3             | 174.0±11.3 | 126.4±54.3 |
|                  |                  | 10 Aug     | -                  | 14.99±5.03 | 14.99±5.03 | 91.0±18.4             | 168.0±25.5 | 129.5±48.0 |
|                  | Snow<br>Crown    | 10 Jul     | 19.51±0.95         | 13.86±2.59 | 16.69±3.52 | 156.0±9.2             | 127.3±79.6 | 141.6±54.7 |
|                  |                  | 25 Jul     | 20.26±1.15         | 15.78±1.43 | 18.02±2.68 | 153.5±31.6            | 149.3±91.5 | 151.7±57.4 |
|                  |                  | 10 Aug     | 11.18±1.66         | 16.11±2.41 | 13.99±3.28 | 86.3±49.1             | 72.0±0.0   | 82.8±40.7  |
|                  | Vitaverde        | 10 Jul     | 15.98±1.75         | 11.77±1.55 | 13.88±2.74 | 118.3±59.2            | 115.0±29.4 | 116.7±41.8 |
|                  |                  | 25 Jul     | 9.40±1.80          | 13.59±0.98 | 12.19±2.43 | 77.0±46.3             | 133.3±25.1 | 105.1±45.7 |
|                  |                  | 10 Aug     | 9.78±1.32          | 14.92±2.17 | 12.72±3.24 | 106.3±38.8            | 89.0±11.8  | 97.6±28.1  |
|                  | Cultivar<br>Mean | Amazing    | 18.35±3.92         | 16.30±2.78 | 16.89±3.13 | 123.4±39.1            | 138.7±49.5 | 131.1±43.6 |
|                  |                  | Cheddar    | 16.36±4.35         | 15.31±1.71 | 15.69±2.81 | 131.1±63.8            | 161.4±61.5 | 145.3±62.5 |
|                  |                  | Clementine | 12.89±4.79         | 15.99±2.46 | 14.75±3.79 | 115.3±44.4            | 135.3±53.5 | 126.2±49.5 |
|                  |                  | Flame Star | 13.87±7.20         | 15.98±3.40 | 15.17±5.01 | 137.1±88.2            | 176.3±21.0 | 155.2±67.0 |
|                  |                  | Snow Crown | 17.51±4.23         | 15.25±2.25 | 16.33±3.46 | 136.1±42.8            | 128.6±75.8 | 132.9±57.1 |
|                  |                  | Vitaverde  | 12.01±3.56         | 13.58±1.97 | 12.92±2.78 | 98.9±46.1             | 112.2±28.3 | 105.5±37.9 |
|                  | Date Mean        | 10 Jul     | 18.64±2.12         | 15.39±2.85 | 17.01±2.98 | 153.4±59.2            | 152.4±57.1 | 152.9±57.3 |
|                  |                  | 25 Jul     | 14.05±6.14         | 15.73±2.40 | 15.22±3.90 | 111.1±49.9            | 148.4±48.7 | 130.3±52.1 |
|                  |                  | 10 Aug     | 10.15±1.68         | 14.94±2.37 | 13.14±3.16 | 103.3±38.4            | 105.6±39.8 | 104.3±38.4 |
| Open<br>Field    | Amazing          | 10 Jul     | 19.08±1.71         | 17.86±1.97 | 18.47±1.83 | 196.1±79.9            | 173.0±94.8 | 188.4±75.9 |
|                  |                  | 25 Jul     | -                  | 17.10±0.29 | 17.10±0.29 | -                     | 185.0±0.0  | 185.0±0.0  |
|                  |                  | 10 Aug     | -                  | 12.41±3.61 | 12.41±3.61 | -                     | 88.7±24.5  | 88.7±24.5  |
|                  | Cheddar          | 10 Jul     | 19.78±0.42         | 16.56±1.48 | 17.63±2.02 | 152.0±8.5             | 180.5±41.7 | 166.3±29.6 |
|                  |                  | 25 Jul     | -                  | 18.14±1.06 | 18.14±1.06 | 132.0±0.0             | 95.5±6.4   | 107.7±21.5 |
|                  |                  | 10 Aug     | -                  | 12.51±3.13 | 12.51±3.13 | 50.0±12.2             | 57.3±44.7  | 53.7±29.6  |
|                  | Clementine       | 10 Jul     | 18.88±1.35         | 16.89±2.10 | 18.03±1.87 | 103.0±34.6            | 68.0±0.0   | 96.0±33.8  |
|                  |                  | 25 Jul     | 17.02±1.07         | 16.73±1.65 | 16.83±1.37 | 155.3±80.9            | 109.3±39.7 | 132.3±62.3 |
|                  |                  | 10 Aug     | -                  | 11.39±3.18 | 11.39±3.18 | 54.0±2.8              | 73.0±35.4  | 63.5±23.2  |
|                  | Flame Star       | 10 Jul     | 20.32±1.06         | 19.53±1.07 | 19.93±1.07 | 190.0±57.9            | 221.0±43.7 | 205.5±50.3 |
|                  |                  | 25 Jul     | -                  | 16.54±0.56 | 16.54±0.56 | 122.0±0.0             | 100.3±8.1  | 105.8±12.7 |
|                  |                  | 10 Aug     | -                  | 11.01±1.43 | 11.01±1.43 | 168.0±22.6            | 117.5±24.7 | 134.3±33.9 |
|                  | Snow<br>Crown    | 10 Jul     | 15.48±3.76         | 16.93±3.24 | 16.20±3.34 | 149.5±24.0            | -          | 149.5±24.0 |
|                  |                  | 25 Jul     | 19.05±0.00         | 15.86±1.60 | 16.50±1.99 | 154.0±0.0             | 120.8±51.3 | 127.4±46.9 |

|                    |             |            |            |            |            |            |            |
|--------------------|-------------|------------|------------|------------|------------|------------|------------|
| Vitaverde          | 10 Aug      | 17.62±0.59 | 15.66±4.71 | 16.44±3.51 | 68.0±0.0   | 97.5±53.0  | 82.8±35.0  |
|                    | 10 Jul      | 17.24±1.37 | 15.75±1.11 | 16.50±1.38 | 115.5±18.4 | 115.7±22.7 | 115.6±18.5 |
|                    | 25 Jul      | -          | 15.99±2.24 | 15.99±2.24 | 108.7±89.1 | 109.0±12.8 | 108.8±56.9 |
|                    | 10 Aug      | 12.70±0.00 | 10.73±2.59 | 11.13±2.41 | 93.8±39.6  | 108.0±26.0 | 100.9±31.9 |
| Cultivar Mean      | Amazing     | 19.08±1.71 | 16.00±3.23 | 16.88±3.16 | 196.1±79.9 | 132.8±66.3 | 158.2±75.1 |
|                    | Cheddar     | 19.78±0.42 | 15.52±3.15 | 16.17±3.29 | 97.7±53.4  | 103.4±63.5 | 100.8±56.7 |
|                    | Clementine  | 18.26±1.50 | 15.60±3.01 | 16.66±2.79 | 109.6±60.5 | 90.3±36.3  | 101.9±51.6 |
|                    | Flame Star  | 20.32±1.06 | 15.69±3.82 | 16.85±3.90 | 174.0±49.0 | 150.5±62.8 | 159.6±57.5 |
|                    | Snow Crown  | 16.60±3.05 | 16.19±2.95 | 16.35±2.91 | 126.9±43.7 | 113.0±47.8 | 120.5±44.3 |
|                    | Vitaverde   | 16.11±2.53 | 13.81±3.27 | 14.47±3.16 | 105.7±47.5 | 110.6±19.7 | 108.0±36.2 |
| Planting Date Mean | 10 Jul      | 18.40±2.48 | 17.34±2.14 | 17.85±2.35 | 150.9±55.3 | 167.2±65.6 | 156.7±58.6 |
|                    | 25 Jul      | 17.70±1.40 | 16.68±1.42 | 16.80±1.43 | 133.3±64.0 | 113.4±34.8 | 120.6±47.1 |
|                    | 10 Aug      | 15.98±2.87 | 12.20±3.15 | 12.69±3.32 | 85.0±46.4  | 93.4±35.3  | 89.9±39.8  |
| Amazing            | 10 Jul      | 19.58±1.55 | 17.86±1.57 | 18.72±1.74 | 173.5±67.7 | 168.4±57.3 | 171.4±60.8 |
|                    | 25 Jul      | -          | 17.37±1.52 | 17.37±1.52 | 110.0±0.0  | 150.0±36.2 | 142.0±36.1 |
| Cheddar            | 10 Aug      | 12.70±0.00 | 12.73±2.61 | 12.73±2.39 | 108.0±41.8 | 81.5±24.6  | 92.9±32.9  |
|                    | 10 Jul      | 18.74±1.38 | 16.17±1.54 | 17.36±1.94 | 156.0±53.7 | 185.6±63.2 | 169.5±57.2 |
| Clementine         | 25 Jul      | -          | 16.34±2.38 | 16.34±2.38 | 149.0±24.0 | 113.0±39.6 | 125.0±37.5 |
|                    | 10 Aug      | 8.89±0.00  | 13.90±3.04 | 13.27±3.32 | 66.8±32.8  | 94.8±61.8  | 79.5±47.7  |
| Flame Star         | 10 Jul      | 18.90±1.98 | 16.59±2.52 | 17.66±2.50 | 106.3±30.9 | 134.4±51.6 | 119.1±41.9 |
|                    | 25 Jul      | 15.50±2.79 | 16.88±1.59 | 16.42±2.05 | 124.6±68.7 | 142.1±57.8 | 133.4±61.7 |
| Snow Crown         | 10 Aug      | 9.34±1.58  | 13.52±2.81 | 11.84±3.14 | 104.8±50.0 | 83.2±24.2  | 94.0±39.1  |
|                    | 10 Jul      | 19.70±1.93 | 18.95±1.32 | 19.35±1.66 | 209.0±67.6 | 209.7±40.8 | 209.3±53.3 |
| Vitaverde          | 25 Jul      | 6.35±1.80  | 16.06±2.62 | 14.12±4.74 | 101.5±39.4 | 129.8±41.1 | 117.2±40.6 |
|                    | 10 Aug      | -          | 12.33±3.24 | 12.33±3.24 | 129.5±47.5 | 134.3±34.3 | 132.4±37.6 |
| Field Mean         | 10 Jul      | 17.50±3.33 | 15.40±3.17 | 16.45±3.32 | 152.8±17.2 | 127.3±79.6 | 144.3±45.5 |
|                    | 25 Jul      | 20.02±1.13 | 15.82±1.41 | 17.43±2.47 | 153.6±27.3 | 133.0±65.9 | 141.6±52.5 |
| Cultivar Mean      | 10 Aug      | 13.75±3.73 | 15.92±3.22 | 15.01±3.46 | 79.0±36.1  | 89.0±40.3  | 82.8±35.2  |
|                    | 10 Jul      | 16.61±1.56 | 13.76±2.49 | 15.19±2.48 | 116.7±36.6 | 115.3±23.5 | 116.1±30.0 |
| Planting Date Mean | 25 Jul      | 9.40±1.80  | 14.61±1.95 | 13.46±2.92 | 90.6±63.3  | 122.9±23.2 | 106.7±48.7 |
|                    | 10 Aug      | 10.51±1.82 | 12.83±3.15 | 12.06±2.92 | 100.0±36.9 | 98.5±21.3  | 99.3±29.1  |
| Field Mean         | High Tunnel | 15.03±4.98 | 15.37±2.52 | 15.24±3.68 | 122.4±53.6 | 138.2±52.9 | 130.1±53.6 |
|                    | Open        | 18.05±2.48 | 15.49±3.23 | 16.25±3.23 | 127.9±60.7 | 119.6±53.1 | 123.6±56.8 |
| Cultivar Mean      | Amazing     | 18.72±2.82 | 16.15±2.94 | 16.88±3.09 | 149.9±64.6 | 136.0±55.4 | 142.4±58.9 |
|                    | Cheddar     | 17.33±3.93 | 15.43±2.54 | 15.92±3.00 | 116.8±59.9 | 132.4±67.2 | 124.6±62.9 |
|                    | Clementine  | 15.19±4.56 | 15.82±2.65 | 15.57±3.49 | 112.6±51.2 | 120.3±52.1 | 116.4±51.1 |
|                    | Flame Star  | 16.73±6.15 | 15.81±3.56 | 16.09±4.43 | 155.6±71.2 | 159.6±52.6 | 157.8±60.6 |
|                    | Snow Crown  | 17.16±3.74 | 15.70±2.59 | 16.34±3.19 | 132.5±42.1 | 121.9±63.6 | 127.9±51.9 |
|                    | Vitaverde   | 13.38±3.72 | 13.69±2.60 | 13.58±3.00 | 102.3±45.8 | 111.4±24.0 | 106.8±36.7 |
| Planting Date Mean | 10 Jul      | 18.51±2.29 | 16.43±2.65 | 17.46±2.68 | 152.0±56.3 | 158.1±59.9 | 154.7±57.6 |
|                    | 25 Jul      | 14.89±5.58 | 16.18±2.03 | 15.89±3.18 | 118.8±55.0 | 132.0±45.7 | 126.3±49.9 |
|                    | 10 Aug      | 11.32±3.03 | 13.57±3.08 | 12.95±3.20 | 95.8±42.1  | 98.8±37.2  | 97.3±39.4  |

Dashes (–) indicate treatment combinations where plants did not survive to harvest due to freeze exposure; these observations were excluded from statistical analysis.

**Table S3.** Days to root length and width of cauliflower cultivars across two growing seasons as affected by field environment and planting date.

| Field       | Cultivar      | Date       | Root Length (cm) |             |             | Root Width (cm) |             |             |
|-------------|---------------|------------|------------------|-------------|-------------|-----------------|-------------|-------------|
|             |               |            | 2023             | 2024        | Year Mean   | 2023            | 2024        | Year Mean   |
| High Tunnel | Amazing       | 10 Jul     | 29.21±4.58       | 26.25±1.47  | 27.73±3.45  | 35.77±6.10      | 43.18±2.54  | 39.48±5.83  |
|             |               | 25 Jul     | 20.32±0.00       | 23.28±6.99  | 22.54±5.90  | 30.48±0.00      | 38.10±9.16  | 36.20±8.39  |
|             |               | 10 Aug     | 22.86±2.54       | 12.70±0.00  | 20.32±5.49  | 35.56±6.72      | 20.32±0.00  | 31.75±9.39  |
|             | Cheddar       | 10 Jul     | 22.54±8.06       | 24.55±1.47  | 23.40±5.86  | 30.48±10.57     | 40.64±2.54  | 34.83±9.36  |
|             |               | 25 Jul     | 43.18±0.00       | 20.32±7.18  | 27.94±14.14 | 41.91±0.00      | 38.10±7.18  | 39.37±5.54  |
|             |               | 10 Aug     | 21.59±6.35       | 18.42±0.90  | 20.32±4.84  | 22.01±4.81      | 30.48±3.59  | 25.40±6.02  |
|             | Clementine    | 10 Jul     | 24.13±5.39       | 30.48±6.56  | 28.36±6.51  | 27.94±7.18      | 43.18±7.18  | 38.10±10.16 |
|             |               | 25 Jul     | 19.05±13.16      | 20.96±6.99  | 20.00±9.81  | 20.64±11.47     | 30.48±9.95  | 25.56±11.25 |
|             |               | 10 Aug     | 25.40±5.49       | 23.50±5.54  | 24.45±5.20  | 32.70±7.06      | 35.56±5.49  | 34.13±6.05  |
|             | Flame Star    | 10 Jul     | 31.12±0.90       | 27.31±0.90  | 29.21±2.32  | 42.55±2.69      | 41.91±1.80  | 42.23±1.91  |
|             |               | 25 Jul     | 23.71±6.00       | 38.10±0.00  | 29.46±8.95  | 32.17±5.29      | 45.72±3.59  | 37.59±8.50  |
|             |               | 10 Aug     | 17.78±0.00       | 21.59±5.39  | 19.69±3.81  | 27.94±3.59      | 35.56±7.18  | 31.75±6.39  |
|             | Snow Crown    | 10 Jul     | 23.18±2.17       | 21.59±3.44  | 22.38±2.79  | 32.39±1.27      | 33.66±7.58  | 33.02±5.08  |
|             |               | 25 Jul     | 20.00±3.65       | 15.24±5.08  | 17.96±4.66  | 29.21±2.54      | 24.55±10.57 | 27.21±6.83  |
|             |               | 10 Aug     | 20.32±8.89       | 16.51±0.00  | 19.37±7.50  | 20.96±9.88      | 25.40±0.00  | 22.44±7.44  |
|             | Vitaverde     | 10 Jul     | 20.32±6.72       | 32.17±19.40 | 26.25±14.52 | 32.17±8.92      | 35.56±7.62  | 33.87±7.65  |
|             |               | 25 Jul     | 14.29±1.22       | 21.59±7.90  | 17.94±6.53  | 21.59±3.28      | 33.02±5.49  | 27.31±7.41  |
|             |               | 10 Aug     | 22.54±4.45       | 24.45±4.56  | 23.50±4.29  | 23.81±7.99      | 34.93±1.27  | 29.37±7.96  |
|             | Cultivar Mean | Amazing    | 25.22±4.89       | 23.04±6.33  | 24.13±5.55  | 34.93±5.60      | 37.74±9.77  | 36.33±7.79  |
|             |               | Cheddar    | 24.77±9.74       | 21.59±4.21  | 23.28±7.60  | 28.73±10.02     | 37.01±5.84  | 32.60±9.12  |
|             |               | Clementine | 22.61±8.98       | 24.98±7.15  | 23.90±7.92  | 26.92±9.94      | 36.41±8.89  | 32.10±10.35 |
|             |               | Flame Star | 24.13±6.48       | 29.00±7.89  | 26.38±7.30  | 33.93±7.14      | 41.06±5.88  | 37.22±7.32  |
|             |               | Snow Crown | 21.24±4.86       | 18.57±4.80  | 20.12±4.89  | 28.83±5.74      | 29.21±8.90  | 29.00±7.08  |
|             |               | Vitaverde  | 18.93±5.46       | 25.52±10.96 | 22.23±9.10  | 25.28±7.67      | 34.41±4.73  | 29.85±7.78  |
|             | Date Mean     | 10 Jul     | 24.55±5.94       | 26.94±8.14  | 25.78±7.16  | 33.13±7.35      | 39.44±6.52  | 36.37±7.55  |
|             |               | 25 Jul     | 20.47±9.17       | 22.37±8.41  | 21.44±8.71  | 26.74±8.35      | 33.87±9.46  | 30.41±9.52  |
|             |               | 10 Aug     | 22.19±5.24       | 21.50±5.24  | 21.90±5.17  | 27.59±8.12      | 32.84±5.85  | 29.88±7.59  |
| Open        | Amazing       | 10 Jul     | 28.89±6.83       | 19.69±0.90  | 25.82±7.12  | 38.42±5.52      | 38.10±3.59  | 38.31±4.57  |
|             |               | 25 Jul     | -                | 26.67±0.00  | 26.67±0.00  | -               | 45.72±0.00  | 45.72±0.00  |
|             |               | 10 Aug     | -                | 22.44±4.46  | 22.44±4.46  | -               | 33.02±7.62  | 33.02±7.62  |
|             | Cheddar       | 10 Jul     | 16.51±1.80       | 12.70±14.37 | 14.61±8.64  | 25.40±7.18      | 39.37±1.80  | 32.39±9.13  |
|             |               | 25 Jul     | 19.05±0.00       | 27.94±0.00  | 24.98±5.13  | 31.75±0.00      | 38.10±0.00  | 35.98±3.67  |
|             |               | 10 Aug     | 15.66±4.08       | 23.71±3.20  | 19.69±5.49  | 24.13±5.82      | 35.56±2.54  | 29.85±7.44  |
|             | Clementine    | 10 Jul     | 23.50±3.81       | 16.51±0.00  | 22.10±4.54  | 32.70±5.52      | 27.94±0.00  | 31.75±5.24  |
|             |               | 25 Jul     | 22.01±5.73       | 22.44±6.99  | 22.23±5.72  | 32.60±10.65     | 33.02±7.62  | 32.81±8.29  |
|             |               | 10 Aug     | 17.15±0.90       | 16.51±1.80  | 16.83±1.22  | 31.75±1.80      | 27.94±7.18  | 29.85±4.81  |
|             | Flame Star    | 10 Jul     | 28.26±7.21       | 30.48±2.07  | 29.37±5.05  | 39.69±8.70      | 46.67±4.32  | 43.18±7.37  |
|             |               | 25 Jul     | 17.78±0.00       | 25.40±4.40  | 23.50±5.24  | 29.21±0.00      | 40.64±5.08  | 37.78±7.06  |
|             |               | 10 Aug     | 22.23±2.69       | 18.73±2.40  | 19.90±2.86  | 31.75±5.39      | 29.53±4.32  | 30.27±4.28  |
|             | Snow Crown    | 10 Jul     | 27.94±4.64       | -           | 27.94±4.64  | 32.07±7.85      | -           | 32.07±7.85  |
|             |               | 25 Jul     | 22.86±0.00       | 25.72±4.91  | 25.15±4.44  | 29.21±0.00      | 36.20±6.68  | 34.80±6.57  |
|             |               | 10 Aug     | 17.78±1.80       | 30.48±3.59  | 24.13±7.69  | 27.94±7.18      | 37.47±4.49  | 32.70±7.36  |
|             | Vitaverde     | 10 Jul     | 22.54±1.91       | 25.40±7.62  | 23.77±4.85  | 32.39±7.37      | 37.68±5.13  | 34.65±6.63  |

|               |             |             |             |             |             |            |             |
|---------------|-------------|-------------|-------------|-------------|-------------|------------|-------------|
|               | 25 Jul      | 16.09±6.99  | 24.55±5.29  | 20.32±7.23  | 27.52±6.99  | 38.95±1.47 | 33.23±7.72  |
|               | 10 Aug      | 17.15±2.20  | 22.86±4.75  | 20.00±4.59  | 29.53±7.58  | 36.83±7.90 | 33.18±8.16  |
| Cultivar Mean | Amazing     | 28.89±6.83  | 22.23±3.83  | 24.89±5.96  | 38.42±5.52  | 36.83±7.14 | 37.47±6.26  |
|               | Cheddar     | 16.51±3.01  | 21.77±8.93  | 19.34±7.15  | 25.82±5.72  | 37.37±2.42 | 32.04±7.24  |
|               | Clementine  | 21.59±4.53  | 19.47±5.55  | 20.74±4.89  | 32.46±6.35  | 30.48±6.43 | 31.67±6.23  |
|               | Flame Star  | 25.04±6.75  | 24.82±5.89  | 24.91±6.04  | 35.92±8.09  | 38.79±8.75 | 37.68±8.38  |
|               | Snow Crown  | 24.31±5.89  | 27.31±4.80  | 25.69±5.42  | 30.48±6.60  | 36.62±5.59 | 33.31±6.70  |
|               | Vitaverde   | 18.82±4.61  | 24.13±5.29  | 21.35±5.53  | 30.02±6.89  | 37.72±5.29 | 33.69±7.20  |
| Date Mean     | 10 Jul      | 25.34±5.90  | 23.28±8.80  | 24.62±7.00  | 34.17±7.55  | 40.22±6.55 | 36.31±7.69  |
|               | 25 Jul      | 19.33±5.38  | 25.16±4.53  | 23.06±5.53  | 30.06±6.78  | 37.78±5.63 | 35.00±7.03  |
|               | 10 Aug      | 17.68±3.09  | 22.15±4.97  | 20.28±4.78  | 28.72±5.97  | 33.44±6.22 | 31.46±6.47  |
| Amazing       | 10 Jul      | 29.03±5.51  | 23.62±3.77  | 26.78±5.43  | 37.28±5.45  | 41.15±3.77 | 38.89±5.03  |
|               | 25 Jul      | 20.32±0.00  | 24.13±5.96  | 23.37±5.43  | 30.48±0.00  | 40.01±8.39 | 38.10±8.42  |
|               | 10 Aug      | 22.86±2.54  | 20.00±6.08  | 21.23±4.79  | 35.56±6.72  | 29.85±8.89 | 32.29±7.99  |
| Cheddar       | 10 Jul      | 20.53±7.02  | 19.81±9.74  | 20.20±7.92  | 28.79±9.18  | 40.13±2.13 | 33.94±8.89  |
|               | 25 Jul      | 31.12±17.06 | 24.13±6.05  | 26.46±9.65  | 36.83±7.18  | 38.10±4.15 | 37.68±4.59  |
|               | 10 Aug      | 18.63±5.77  | 21.59±3.70  | 19.97±4.95  | 23.07±4.91  | 33.53±3.77 | 27.82±6.90  |
| Clementine    | 10 Jul      | 23.71±3.82  | 27.69±8.44  | 25.52±6.34  | 31.12±5.89  | 40.13±9.23 | 35.21±8.58  |
|               | 25 Jul      | 20.32±10.00 | 21.59±6.43  | 20.96±8.11  | 25.76±12.02 | 31.57±8.41 | 28.67±10.41 |
|               | 10 Aug      | 22.65±6.03  | 21.17±5.66  | 21.91±5.63  | 32.39±5.55  | 33.02±6.62 | 32.70±5.84  |
| Flame Star    | 10 Jul      | 29.21±5.79  | 29.42±2.33  | 29.32±4.21  | 40.64±7.00  | 45.09±4.23 | 42.86±5.98  |
|               | 25 Jul      | 22.23±5.73  | 30.48±7.62  | 26.81±7.76  | 31.43±4.56  | 42.67±4.89 | 37.68±7.41  |
|               | 10 Aug      | 20.00±3.00  | 19.69±3.38  | 19.81±3.06  | 29.85±4.34  | 31.54±5.59 | 30.86±4.94  |
| Snow Crown    | 10 Jul      | 25.56±4.21  | 21.59±3.44  | 24.24±4.28  | 32.23±5.21  | 33.66±7.58 | 32.70±5.79  |
|               | 25 Jul      | 20.57±3.41  | 21.23±7.21  | 20.96±5.72  | 29.21±2.20  | 31.21±9.92 | 30.37±7.51  |
|               | 10 Aug      | 19.30±6.50  | 25.82±8.46  | 21.75±7.48  | 24.45±8.12  | 33.44±7.66 | 28.30±8.70  |
| Vitaverde     | 10 Jul      | 21.59±4.28  | 28.79±13.69 | 24.91±10.06 | 32.29±7.33  | 36.62±5.93 | 34.29±6.82  |
|               | 25 Jul      | 15.06±4.24  | 22.86±6.56  | 18.96±6.67  | 24.13±5.63  | 35.56±5.08 | 29.85±7.86  |
|               | 10 Aug      | 19.84±4.34  | 23.65±4.40  | 21.75±4.66  | 26.67±7.83  | 35.88±5.33 | 31.27±8.03  |
| Field Mean    | High Tunnel | 22.44±6.99  | 23.83±7.81  | 23.11±7.40  | 29.20±8.30  | 35.66±7.97 | 32.37±8.72  |
|               | Open        | 21.85±6.15  | 23.50±6.07  | 22.69±6.13  | 31.72±7.26  | 36.72±6.61 | 34.28±7.34  |
| Cultivar Mean | Amazing     | 26.55±5.64  | 22.66±5.13  | 24.45±5.61  | 36.20±5.57  | 37.32±8.32 | 36.80±7.07  |
|               | Cheddar     | 21.23±8.52  | 21.68±6.71  | 21.45±7.53  | 27.49±8.30  | 37.19±4.30 | 32.34±8.15  |
|               | Clementine  | 22.12±7.05  | 23.14±7.02  | 22.62±6.96  | 29.54±8.68  | 34.43±8.46 | 31.92±8.81  |
|               | Flame Star  | 24.58±6.37  | 26.30±6.73  | 25.52±6.52  | 34.93±7.40  | 39.59±7.74 | 37.49±7.83  |
|               | Snow Crown  | 22.44±5.34  | 22.32±6.43  | 22.38±5.74  | 29.51±5.97  | 32.39±8.32 | 30.81±7.15  |
|               | Vitaverde   | 18.88±4.93  | 24.86±8.55  | 21.80±7.49  | 27.65±7.52  | 35.98±5.16 | 31.72±7.66  |
| Date Mean     | 10 Jul      | 24.99±5.85  | 25.52±8.45  | 25.22±7.06  | 33.70±7.38  | 39.74±6.44 | 36.34±7.56  |
|               | 25 Jul      | 20.08±7.96  | 23.68±6.91  | 22.12±7.54  | 27.89±7.87  | 35.71±8.03 | 32.32±8.81  |
|               | 10 Aug      | 20.36±4.97  | 21.87±5.02  | 21.11±5.01  | 28.06±7.21  | 33.18±5.97 | 30.66±7.04  |

Dashes (–) indicate treatment combinations where plants did not survive to harvest due to freeze exposure; these observations were excluded from statistical analysis.

**Table S4.** Days to leaf number and plant height of cauliflower cultivars for two growing seasons as affected by field environment and planting date.

| Field       | Cultivar      | Date       | Leaf Number |             |            | Plant Height (cm) |             |             |
|-------------|---------------|------------|-------------|-------------|------------|-------------------|-------------|-------------|
|             |               |            | 2023        | 2024        | Year Mean  | 2023              | 2024        | Year Mean   |
| High Tunnel | Amazing       | 10 Jul     | 26.67±3.21  | 22.75±11.24 | 24.43±8.42 | 71.12±4.40        | 54.93±24.04 | 61.87±19.24 |
|             |               | 25 Jul     | 17.00±0.00  | 32.75±4.99  | 29.60±8.26 | 67.31±0.00        | 85.09±7.90  | 81.53±10.49 |
|             |               | 10 Aug     | 23.25±4.99  | 29.50±5.00  | 26.38±5.71 | 74.93±1.47        | 71.12±17.23 | 73.03±11.50 |
|             | Cheddar       | 10 Jul     | 24.50±0.58  | 27.25±5.06  | 25.88±3.64 | 68.90±8.45        | 76.84±3.81  | 72.87±7.40  |
|             |               | 25 Jul     | 20.00±0.00  | 27.50±4.12  | 26.00±4.90 | 73.66±0.00        | 74.93±6.05  | 74.68±5.27  |
|             |               | 10 Aug     | 17.25±1.89  | 26.50±3.87  | 21.88±5.69 | 59.06±20.91       | 76.84±4.81  | 67.95±16.96 |
|             | Clementine    | 10 Jul     | 21.50±3.54  | 17.00±7.44  | 18.50±6.41 | 80.65±8.08        | 67.31±31.89 | 71.76±25.90 |
|             |               | 25 Jul     | 13.00±7.35  | 24.75±3.30  | 18.88±8.20 | 67.95±28.54       | 84.46±6.99  | 76.20±21.16 |
|             |               | 10 Aug     | 18.50±1.73  | 25.50±2.38  | 22.00±4.21 | 82.55±7.69        | 78.11±11.43 | 80.33±9.33  |
|             | Flame Star    | 10 Jul     | 20.67±4.04  | 17.25±8.85  | 18.71±6.92 | 80.01±17.46       | 55.88±21.65 | 66.22±22.41 |
|             |               | 25 Jul     | 15.00±1.00  | 23.50±4.65  | 19.86±5.64 | 70.27±2.93        | 76.84±3.20  | 74.02±4.50  |
|             |               | 10 Aug     | 17.25±1.89  | 25.50±3.11  | 21.38±5.01 | 74.30±7.51        | 77.47±3.28  | 75.88±5.63  |
|             | Snow Crown    | 10 Jul     | 25.50±1.29  | 29.50±7.23  | 27.50±5.26 | 82.87±3.34        | 79.38±16.90 | 81.12±11.43 |
|             |               | 25 Jul     | 20.00±2.94  | 24.50±2.65  | 22.25±3.54 | 84.77±7.29        | 75.57±20.57 | 80.17±15.11 |
|             |               | 10 Aug     | 20.00±3.00  | 23.75±3.50  | 22.14±3.63 | 77.89±22.37       | 83.82±4.64  | 81.28±13.70 |
|             | Vitaverde     | 10 Jul     | 15.00±6.06  | 17.75±8.81  | 16.38±7.15 | 59.06±27.52       | 57.79±23.41 | 58.42±23.66 |
|             |               | 25 Jul     | 14.00±2.00  | 25.50±2.52  | 19.75±6.50 | 60.33±12.85       | 81.28±4.64  | 70.80±14.33 |
|             |               | 10 Aug     | 17.25±0.96  | 26.75±3.59  | 22.00±5.63 | 82.23±1.91        | 78.74±3.59  | 80.49±3.25  |
|             | Cultivar Mean | Amazing    | 23.75±4.89  | 28.33±8.18  | 26.50±7.27 | 72.55±3.81        | 70.38±20.52 | 71.25±15.82 |
|             |               | Cheddar    | 20.78±3.83  | 27.08±3.99  | 24.38±4.98 | 65.05±15.01       | 76.20±4.60  | 71.42±11.56 |
|             |               | Clementine | 16.90±5.74  | 22.42±5.98  | 19.91±6.38 | 76.33±18.74       | 76.62±19.52 | 76.49±18.71 |
|             |               | Flame Star | 17.60±3.24  | 22.08±6.58  | 20.05±5.69 | 74.80±10.22       | 70.06±15.60 | 72.22±13.34 |
|             |               | Snow Crown | 22.00±3.55  | 25.92±5.16  | 24.04±4.80 | 82.20±11.30       | 79.59±14.54 | 80.84±12.87 |
|             |               | Vitaverde  | 15.42±3.65  | 23.33±6.61  | 19.38±6.61 | 67.20±19.39       | 72.60±16.72 | 69.90±17.92 |
|             | Date Mean     | 10 Jul     | 22.25±5.24  | 21.92±8.96  | 22.07±7.42 | 72.90±15.80       | 65.35±21.96 | 68.78±19.56 |
|             |               | 25 Jul     | 15.88±4.59  | 26.42±4.62  | 22.05±6.95 | 70.82±16.56       | 79.69±9.82  | 76.01±13.59 |
|             |               | 10 Aug     | 18.87±3.29  | 26.25±3.70  | 22.64±5.09 | 75.04±13.75       | 77.68±8.89  | 76.39±11.48 |
| Open        | Amazing       | 10 Jul     | 24.50±1.29  | 32.25±5.06  | 28.38±5.37 | 64.14±3.36        | 66.04±2.07  | 65.09±2.78  |
|             |               | 25 Jul     | -           | 24.75±7.41  | 24.75±7.41 | -                 | 60.33±15.15 | 60.33±15.15 |
|             |               | 10 Aug     | 14.50±2.12  | 28.75±2.75  | 24.00±7.72 | 31.12±0.90        | 60.33±6.99  | 50.59±16.03 |
|             | Cheddar       | 10 Jul     | 18.67±4.93  | 28.25±4.79  | 24.14±6.77 | 55.03±10.34       | 60.33±4.34  | 58.06±7.29  |
|             |               | 25 Jul     | -           | 27.00±2.83  | 27.00±2.83 | -                 | 66.68±4.81  | 66.68±4.81  |
|             |               | 10 Aug     | 17.00±2.65  | 27.00±2.71  | 22.71±5.88 | 59.69±7.93        | 62.23±4.40  | 61.14±5.70  |
|             | Clementine    | 10 Jul     | 23.25±0.96  | 24.00±4.24  | 23.63±2.88 | 71.76±3.20        | 64.14±13.50 | 67.95±9.95  |
|             |               | 25 Jul     | 19.00±2.16  | 21.25±2.75  | 20.13±2.59 | 72.71±3.18        | 67.31±11.82 | 70.01±8.52  |
|             |               | 10 Aug     | 17.50±2.65  | 21.25±2.36  | 19.38±3.07 | 59.69±13.83       | 59.69±8.68  | 59.69±10.69 |
|             | Flame Star    | 10 Jul     | 18.50±2.52  | 28.25±1.89  | 23.38±5.60 | 65.09±1.91        | 69.85±1.47  | 67.47±2.99  |
|             |               | 25 Jul     | 16.67±4.62  | 22.00±2.16  | 19.71±4.19 | 55.88±5.08        | 67.95±3.20  | 62.77±7.44  |
|             |               | 10 Aug     | 17.33±0.58  | 22.75±1.26  | 20.43±3.05 | 64.77±8.89        | 60.96±3.59  | 62.59±6.08  |
|             | Snow Crown    | 10 Jul     | 23.75±2.22  | 25.50±5.32  | 24.63±3.89 | 69.85±3.28        | 70.49±6.35  | 70.17±4.69  |
|             |               | 25 Jul     | 21.00±4.24  | 22.50±1.73  | 22.00±2.45 | 62.23±1.80        | 70.80±5.12  | 67.95±6.00  |
|             |               | 10 Aug     | 21.00±0.00  | 24.00±2.16  | 23.00±2.28 | 70.49±4.49        | 70.49±6.99  | 70.49±5.78  |
|             | Vitaverde     | 10 Jul     | 17.50±2.65  | 25.50±5.26  | 21.50±5.76 | 65.09±6.99        | 62.23±4.86  | 63.66±5.78  |

|               |             |            |            |            |             |             |             |
|---------------|-------------|------------|------------|------------|-------------|-------------|-------------|
|               | 25 Jul      | 20.50±2.38 | 19.75±5.80 | 20.13±4.12 | 66.04±2.93  | 58.74±15.67 | 62.39±11.14 |
|               | 10 Aug      | 18.00±0.82 | 24.00±1.15 | 21.00±3.34 | 69.22±3.36  | 67.95±2.43  | 68.58±2.80  |
| Cultivar Mean | Amazing     | 21.17±5.34 | 28.58±5.85 | 26.11±6.60 | 53.13±17.25 | 62.23±9.22  | 59.20±12.73 |
|               | Cheddar     | 17.83±3.66 | 27.42±3.29 | 24.22±5.70 | 57.36±8.63  | 63.08±4.94  | 61.17±6.74  |
|               | Clementine  | 19.92±3.15 | 22.17±3.21 | 21.04±3.32 | 68.05±9.80  | 63.71±10.91 | 65.88±10.38 |
|               | Flame Star  | 17.60±2.76 | 24.33±3.34 | 21.27±4.57 | 62.23±6.61  | 66.25±4.78  | 64.42±5.91  |
|               | Snow Crown  | 22.38±2.62 | 24.00±3.38 | 23.35±3.13 | 68.10±4.60  | 70.59±5.61  | 69.60±5.25  |
|               | Vitaverde   | 18.67±2.35 | 23.08±4.85 | 20.88±4.36 | 66.78±4.70  | 62.97±9.53  | 64.88±7.60  |
| Date Mean     | 10 Jul      | 21.13±3.70 | 27.29±4.90 | 24.28±5.31 | 65.60±6.87  | 65.51±7.07  | 65.55±6.89  |
|               | 25 Jul      | 19.23±3.22 | 22.88±4.52 | 21.59±4.43 | 65.16±7.17  | 65.30±10.36 | 65.25±9.26  |
|               | 10 Aug      | 17.56±2.25 | 24.63±3.21 | 21.60±4.52 | 60.68±13.72 | 63.61±6.72  | 62.35±10.27 |
| Amazing       | 10 Jul      | 25.43±2.37 | 27.50±9.53 | 26.53±7.00 | 67.13±5.10  | 60.48±16.87 | 63.58±12.86 |
|               | 25 Jul      | 17.00±0.00 | 28.75±7.25 | 27.44±7.83 | 67.31±0.00  | 72.71±17.33 | 72.11±16.31 |
|               | 10 Aug      | 20.33±6.02 | 29.13±3.76 | 25.36±6.48 | 60.33±22.66 | 65.72±13.47 | 63.41±17.40 |
| Cheddar       | 10 Jul      | 22.00±4.24 | 27.75±4.59 | 25.07±5.20 | 62.96±11.24 | 68.58±9.60  | 65.96±10.42 |
|               | 25 Jul      | 20.00±0.00 | 27.25±3.28 | 26.44±3.91 | 73.66±0.00  | 70.80±6.71  | 71.12±6.35  |
|               | 10 Aug      | 17.14±2.04 | 26.75±3.11 | 22.27±5.59 | 59.33±15.48 | 69.53±8.90  | 64.77±13.04 |
| Clementine    | 10 Jul      | 22.67±1.97 | 20.50±6.74 | 21.43±5.21 | 74.72±6.35  | 65.72±22.74 | 69.58±17.75 |
|               | 25 Jul      | 16.00±5.95 | 23.00±3.38 | 19.50±5.91 | 70.33±18.97 | 75.88±12.84 | 73.10±15.91 |
|               | 10 Aug      | 18.00±2.14 | 23.38±3.16 | 20.69±3.81 | 71.12±16.02 | 68.90±13.61 | 70.01±14.40 |
| Flame Star    | 10 Jul      | 19.43±3.15 | 22.75±8.35 | 21.20±6.48 | 71.48±12.92 | 62.87±16.05 | 66.89±14.84 |
|               | 25 Jul      | 15.83±3.13 | 22.75±3.45 | 19.79±4.77 | 63.08±8.71  | 72.39±5.60  | 68.40±8.30  |
|               | 10 Aug      | 17.29±1.38 | 24.13±2.64 | 20.93±4.10 | 70.21±8.97  | 69.22±9.38  | 69.68±8.88  |
| Snow Crown    | 10 Jul      | 24.63±1.92 | 27.50±6.26 | 26.06±4.71 | 76.36±7.60  | 74.93±12.74 | 75.64±10.16 |
|               | 25 Jul      | 20.33±3.01 | 23.50±2.33 | 22.14±3.01 | 77.26±12.96 | 73.18±14.11 | 74.93±13.27 |
|               | 10 Aug      | 20.40±2.19 | 23.88±2.70 | 22.54±2.99 | 74.93±16.49 | 77.15±9.00  | 76.30±11.79 |
| Vitaverde     | 10 Jul      | 16.25±4.53 | 21.63±7.89 | 18.94±6.81 | 62.07±18.87 | 60.01±15.83 | 61.04±16.86 |
|               | 25 Jul      | 17.25±4.03 | 22.63±5.15 | 19.94±5.26 | 63.18±9.15  | 70.01±16.11 | 66.60±13.14 |
|               | 10 Aug      | 17.63±0.92 | 25.38±2.88 | 21.50±4.50 | 75.72±7.40  | 73.34±6.43  | 74.53±6.81  |
| Field Mean    | High Tunnel | 19.15±5.00 | 24.86±6.46 | 22.27±6.48 | 73.13±15.11 | 74.24±15.93 | 73.74±15.51 |
|               | Open Field  | 19.48±3.48 | 24.93±4.59 | 22.60±4.94 | 63.85±9.84  | 64.81±8.14  | 64.40±8.88  |
| Cultivar Mean | Amazing     | 22.64±5.06 | 28.46±6.96 | 26.32±6.87 | 64.23±14.89 | 66.30±16.11 | 65.54±15.50 |
|               | Cheddar     | 19.60±3.92 | 27.25±3.58 | 24.31±5.26 | 61.98±13.06 | 69.64±8.17  | 66.69±10.84 |
|               | Clementine  | 18.55±4.66 | 22.29±4.69 | 20.50±5.00 | 71.81±14.78 | 70.17±16.81 | 70.95±15.72 |
|               | Flame Star  | 17.60±2.93 | 23.21±5.23 | 20.66±5.14 | 68.52±10.57 | 68.16±11.45 | 68.32±10.93 |
|               | Snow Crown  | 22.16±3.11 | 24.96±4.38 | 23.72±4.08 | 76.27±11.42 | 75.09±11.72 | 75.61±11.46 |
|               | Vitaverde   | 17.04±3.43 | 23.21±5.67 | 20.13±5.59 | 66.99±13.80 | 67.79±14.19 | 67.39±13.85 |
| Date Mean     | 10 Jul      | 21.65±4.46 | 24.60±7.64 | 23.21±6.48 | 68.99±12.30 | 65.43±16.13 | 67.11±14.48 |
|               | 25 Jul      | 17.33±4.33 | 24.65±4.87 | 21.83±5.86 | 68.37±13.44 | 72.50±12.35 | 70.91±12.86 |
|               | 10 Aug      | 18.29±2.93 | 25.44±3.52 | 22.15±4.83 | 68.73±15.36 | 70.64±10.55 | 69.76±12.95 |

Dashes (–) indicate treatment combinations where plants did not survive to harvest due to freeze exposure; these observations were excluded from statistical analysis.
